# Supplementary material for: A Review Exploring the Relationship Between Nursing Home Staffing and Antipsychotic Medication Use
Source: Springer Nature journal article supplement (doi:10.1007/s40120-015-0032-2), 2015-09-01
Supplement: MOESM1 [file 9339526]

- Factors beyond clinical necessity may influence antipsychotic prescribing patterns.
- Evidence suggests an association between nurse staffing levels and antipsychotic medication use.
- Studies of staffing levels and other management characteristics of nursing homes that may influence clinical quality are limited.

This summary slide represents the opinions of the authors. No funding or sponsorship was received for this study or publication of this article. For a full list of acknowledgments and conflicts of interest for all authors of this article, please see the full text online. Copyright © The Author 2015. Creative Commons Attribution Noncommercial License (CC BY-NC).
